# Supplementary material for: Quantitative PPARγ expression affects the balance between tolerance and immunity
Source: PubMed Central journal article supplement (PMC4879582; doi:10.1038/srep26646), 2016-05-25
Supplement: srep26646-s1.pdf [file srep26646-s1.pdf]

## **Quantitative PPAR $\gamma$ expression affects the balance between tolerance and immunity**

Ya-Hui Liu<sup>1</sup>, Yau-Sheng Tsai<sup>1,2,3</sup>, Shih-Chieh Lin<sup>4</sup>, Nan-Shih Liao<sup>5</sup>, Ming-Shiou Jan<sup>6</sup>, Chung-Tiang Liang<sup>7</sup>,

Shih-Wen Hsu<sup>8</sup>, Wen-Chung Chen<sup>9</sup>, Junne-Ming Sung<sup>10</sup>, Nobuyo Maeda<sup>11</sup>, and Pei-Jane Tsai<sup>1,8,12</sup>

**A**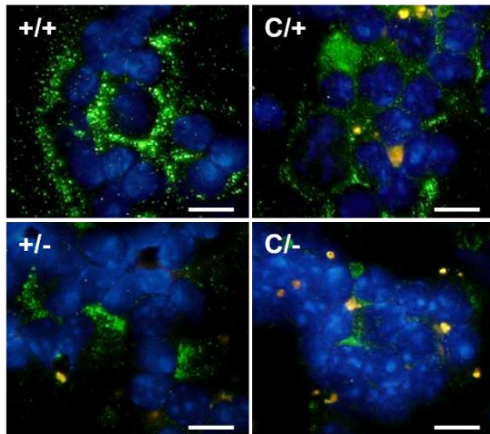

Blue: Hoechst  
Green: PPAR $\gamma$

**B**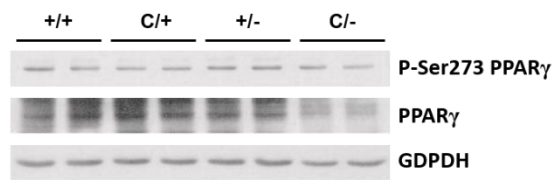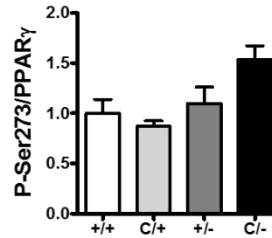**C**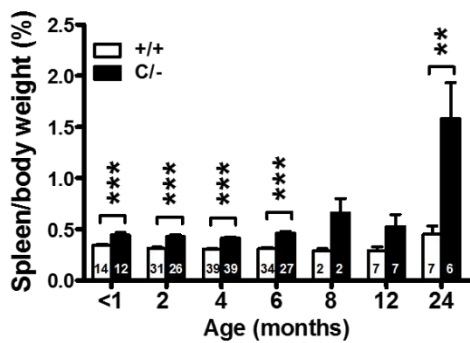**D**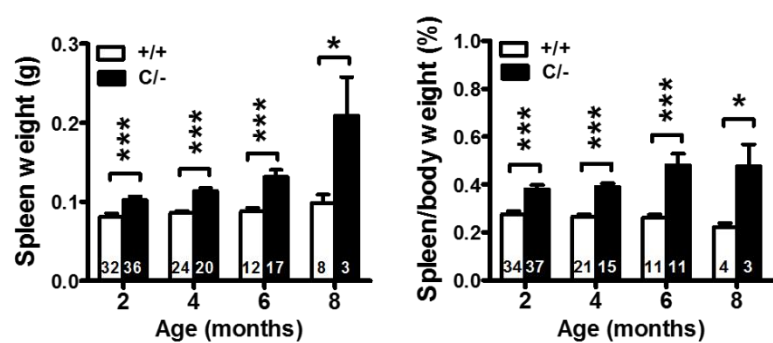

**Supplemental Figure S1. Spleen enlargement in PPAR $\gamma$  hypomorphic mice.** (A) Immunofluorescent staining of PPAR $\gamma$  (green) in splenocytes. The Hoechst nuclear counterstain appears blue. Scale bar, 20  $\mu$ m (B) Ser273 phosphorylation of PPAR $\gamma$  in splenocytes was determined by immunoblotting using antibodies against P-Ser273 PPAR $\gamma$  and PPAR $\gamma$ . (C) Spleen-to-body weight ratio in female mice. (D) Spleen weight and spleen-to-body weight ratio in male mice. Numbers inside bars indicate the number for each group. \* $p$  < 0.05; \*\* $p$  < 0.01; \*\*\* $p$  < 0.001.

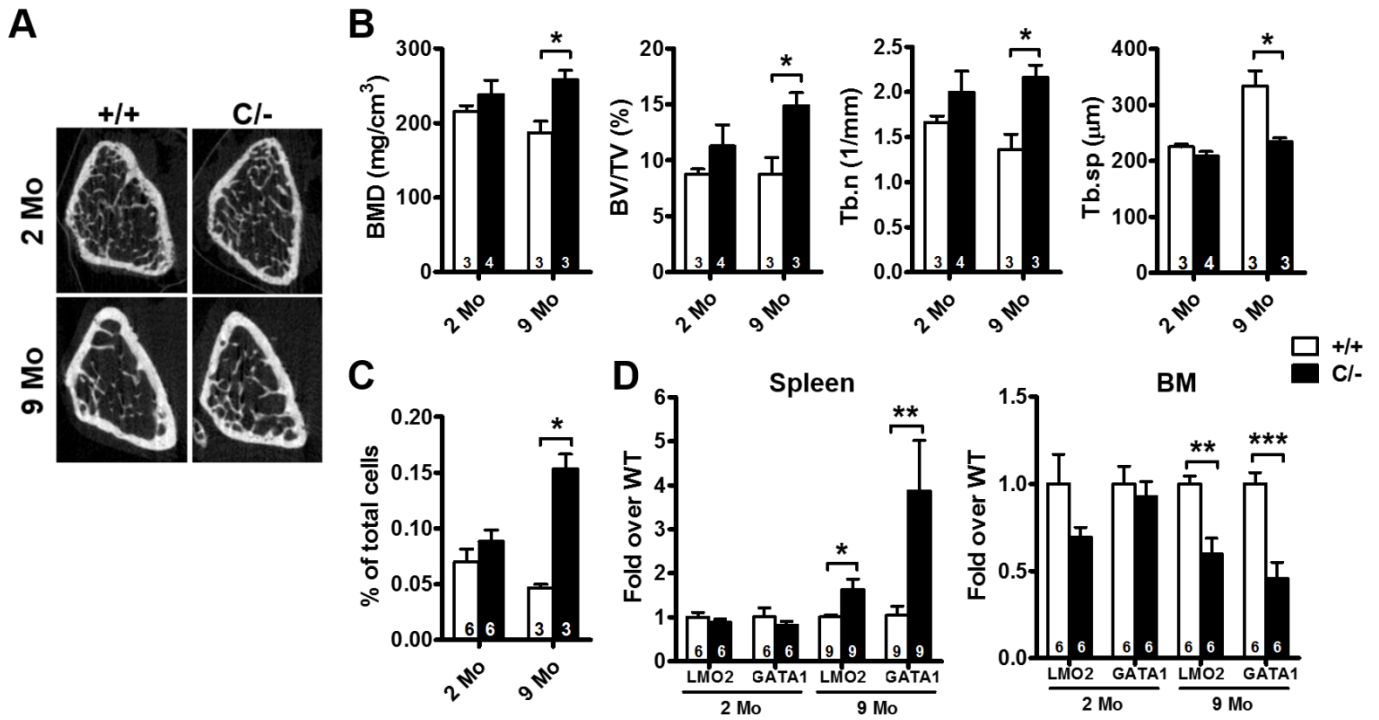

**Supplemental Figure S2. Effects of PPAR $\gamma$  hypomorph on bone formation and hematopoietic stem cell relocation.** (A) Micro-CT images of the distal femur metaphysis and (B) quantification of structural parameters of femoral metaphysis from 2-mo-old and 9-mo-old mice. Bone marrow density (BMD); trabecular volume (BV/TV); trabecular number (Tb.n); trabecular separation (Tb.sp). (C) Flow cytometric analysis of hematopoietic stem cells (HSCs) in the spleen of 2-mo-old and 9-mo-old mice. (D) Expression of transcription factors regulating early hematopoiesis in the spleen and bone marrow of 2-mo-old and 9-mo-old mice. LMO2, LIM domain only 2; GATA1, GATA-binding protein 1. Numbers inside bars indicate the number for each group. \* $p < 0.05$ ; \*\* $p < 0.01$ ; \*\*\* $p < 0.001$ .

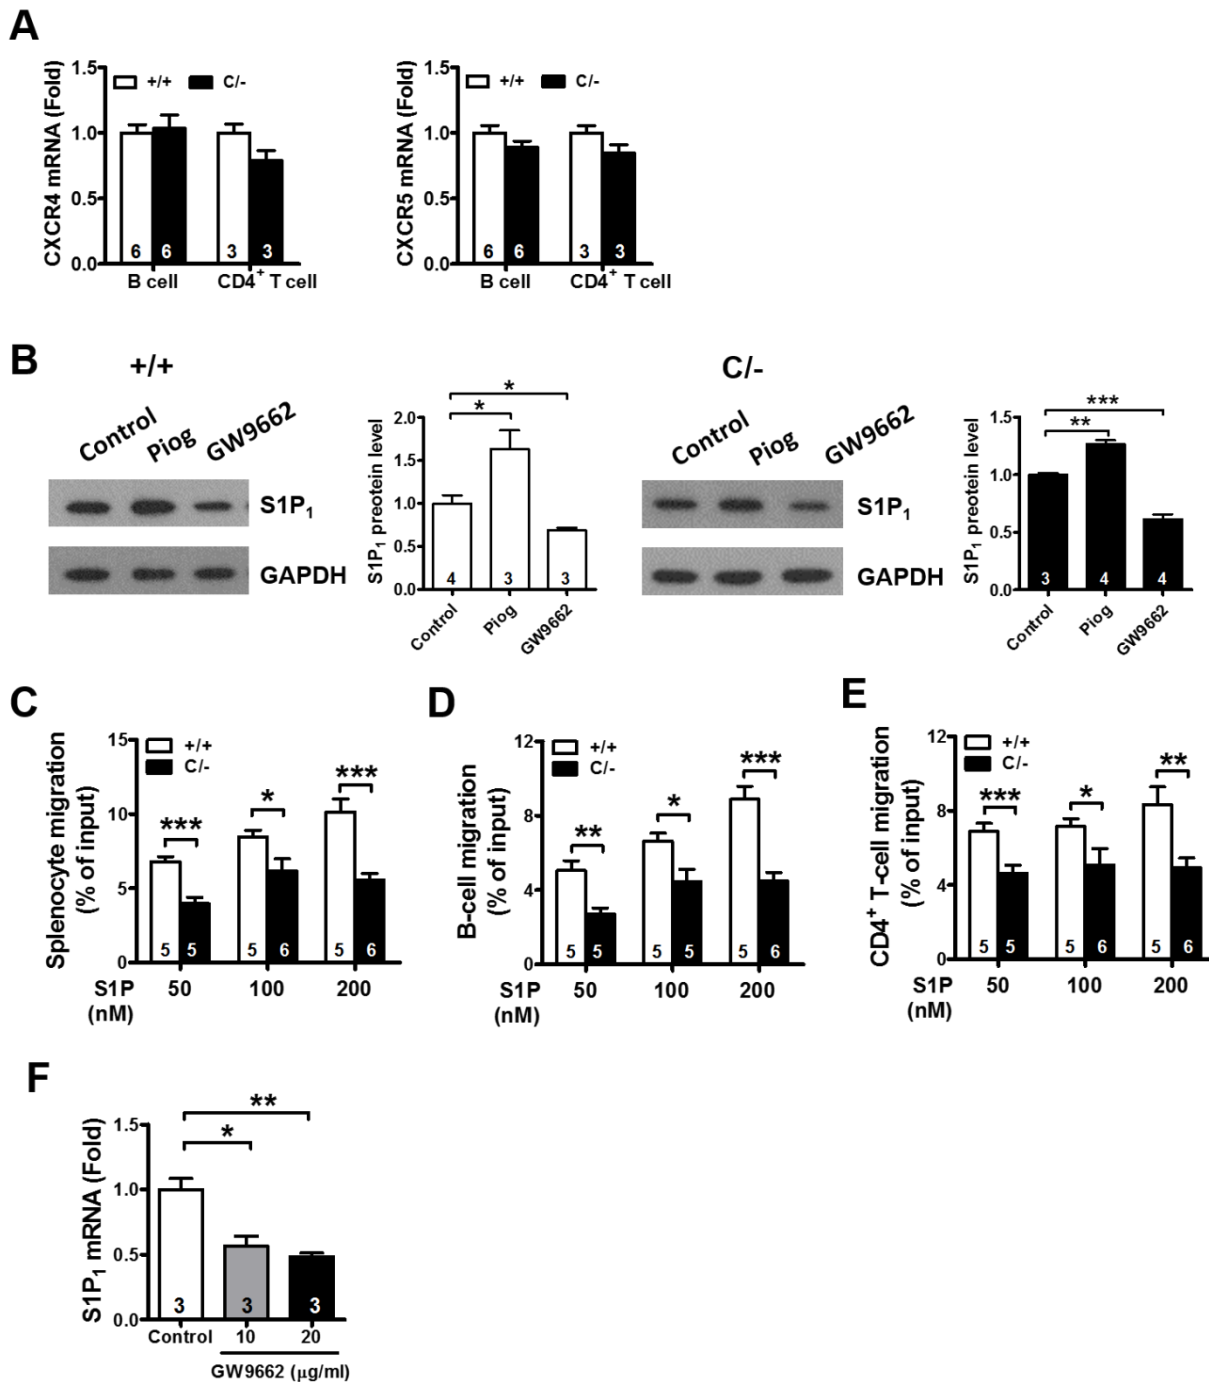

**Supplemental Figure S3. Migration ability of splenocytes toward S1P and S1P<sub>1</sub> expression after modulation of PPAR $\gamma$  activity.** (A) CXCR4 and CXCR5 mRNA levels in B cells and CD4<sup>+</sup> T cells from 3-mo-old mice. (B) S1P<sub>1</sub> protein levels in WT and *Pparg*<sup>C/-</sup> splenocytes after treatment with 80  $\mu$ M Piog and 20  $\mu$ M GW9662 for 24 hours. Migration of (C) splenocytes, (D) B cells and (E) CD4<sup>+</sup> T cells in response to different concentrations of S1P in Transwell migration assays. \* $p$  < 0.05; \*\* $p$  < 0.01; \*\*\* $p$  < 0.001. Two-way ANOVA for splenocyte migration in panel (C) shows effects of genotype ( $p$  < 0.001) and S1P dosage ( $p$  < 0.01). Two-way ANOVA for B-cell migration in panel (D) shows effects of genotype ( $p$  < 0.001) and S1P dosage ( $p$  < 0.001) with an interaction between these factors ( $p$  < 0.05). Two-way ANOVA for CD4<sup>+</sup> T-cell migration in panel (E) shows effect of genotype ( $p$  < 0.001). (F) S1P<sub>1</sub> expression in mouse embryonic fibroblasts treated with GW9662 (10 and 20  $\mu$ g/ml) for 24 hours. Numbers inside bars indicate the number for each group.

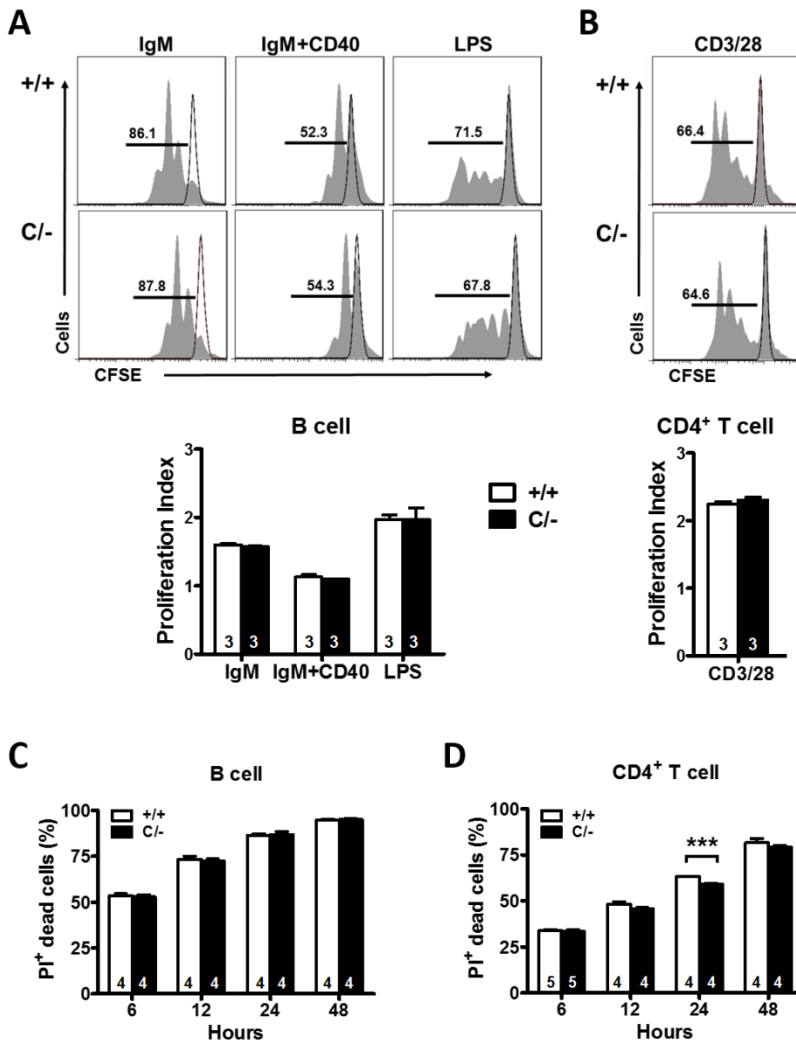

**Supplemental Figure S4. In vitro cell proliferation and apoptosis.** (A) CFSE-labeled B cells stimulated with anti-IgM (30  $\mu\text{g/ml}$ ) antibodies, a combination of anti-IgM (15  $\mu\text{g/ml}$ ) and anti-CD40 (10  $\mu\text{g/ml}$ ) antibodies, and LPS (10  $\mu\text{g/ml}$ ). (B) CFSE-labeled CD4<sup>+</sup> T cells stimulated with anti-CD3/CD28 (4  $\mu\text{g/ml}$ ) antibodies. Proliferation was analyzed by flow cytometry and the proliferation index was quantified by FlowJo software. Numbers inside bars indicate the number for each group. Percentages of propidium iodide (PI)-positive (C) B cells and (D) CD4<sup>+</sup> T cells cultured in the serum-free medium. B cells and CD4<sup>+</sup> T cells were isolated from 3-mo-old mice. Numbers inside bars indicate the number for each group.

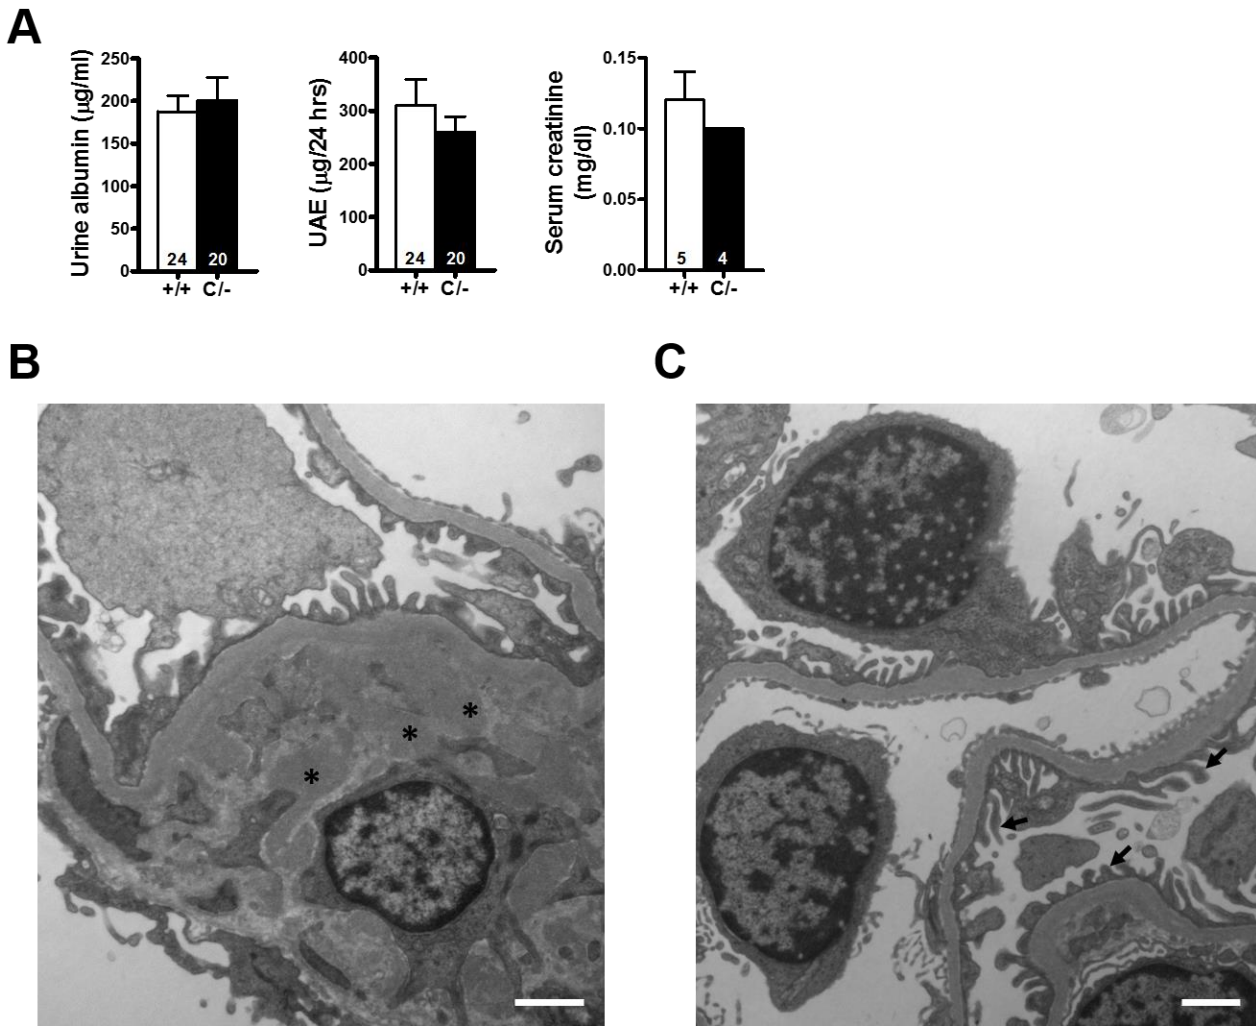

**Supplemental Figure S5. Normal kidney function but electron-dense deposits in mesangial cells of *Pparg*<sup>C/-</sup> kidney.** (A) Urine albumin concentration, daily urinary albumin excretion (UAE), and serum creatinine levels of 14-mo-old mice. Numbers inside bars indicate the number for each group. (B–C) Transmission electron microscopy of glomeruli. *Asterisks* show electron-dense deposits in the mesangium, and *black arrows* indicate normal podocyte foot processes. Scale bar, 1 µm.

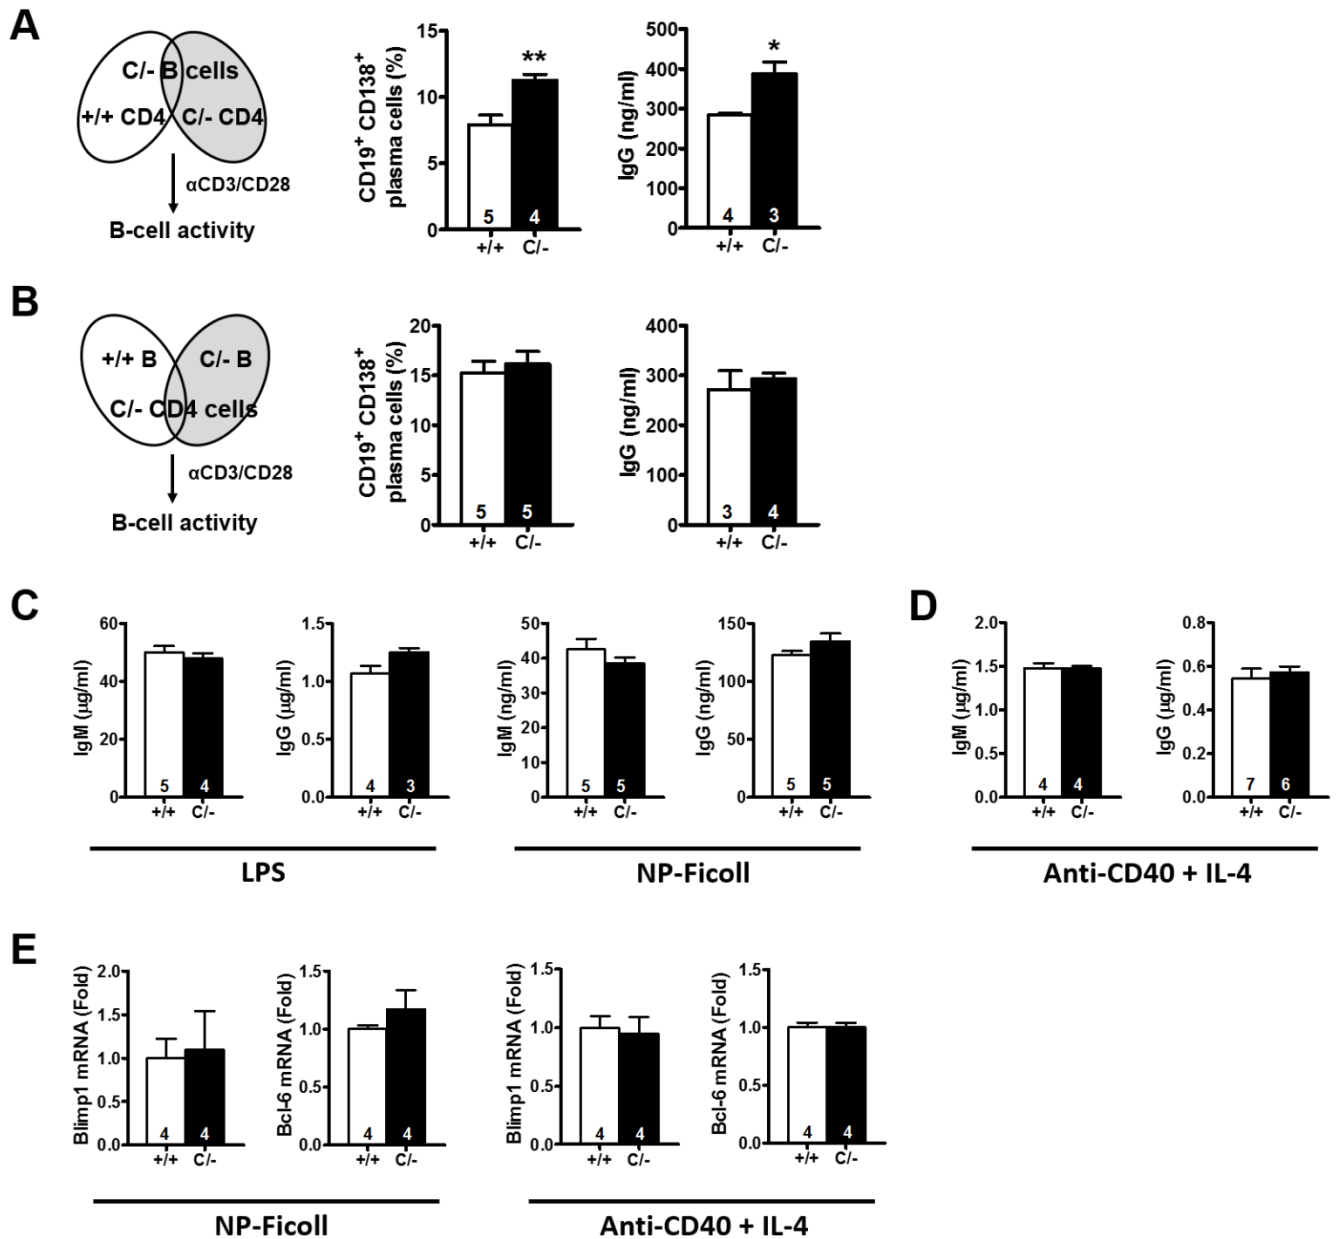

**Supplemental Figure S6. In vitro B-cell response.** (A) Coculture of *Pparg*<sup>C/-</sup> B cells with WT or *Pparg*<sup>C/-</sup> CD4<sup>+</sup> T cells. Percentages of plasma cells (CD19<sup>+</sup> CD138<sup>+</sup>) gating from B cells (CD19<sup>+</sup>) measured by flow cytometry after anti-CD3/CD28 stimulation for 3 d, and IgG production in the medium measured after anti-CD3/CD28 stimulation for 7 d. (B) Coculture of *Pparg*<sup>C/-</sup> CD4<sup>+</sup> T cells with WT or *Pparg*<sup>C/-</sup> B cells, the same parameters as in A were measured. IgM and IgG production from WT or *Pparg*<sup>C/-</sup> B cells after stimulations with (C) LPS (5 µg/ml), NP-Ficoll (10 µg/ml), or (D) anti-CD40 (5 µg/ml) plus IL-4 (25 ng/ml) for 5 d. B cells were isolated from 4–6-mo-old mice. (E) Blimp1 and Bcl-6 mRNA levels of B cells in response to NP-Ficoll (10 µg/ml) or anti-CD40 (5 µg/ml) plus IL-4 (25 ng/ml) for 3 d. Numbers inside bars indicate the number for each group. \**p* < 0.05 and \*\**p* < 0.01.

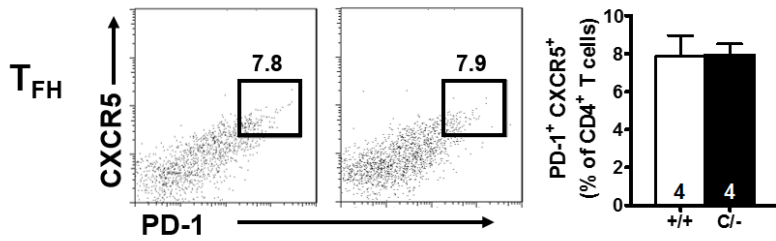

**Supplemental Figure S7. Analysis of Tfh cells in the spleen of older WT and *Pparg*<sup>C/-</sup> mice.** Flow cytometric analysis of the expression of PD-1 and CXCR5 on the splenic CD4<sup>+</sup> T cells. Numbers inside bars indicate the number for each group.



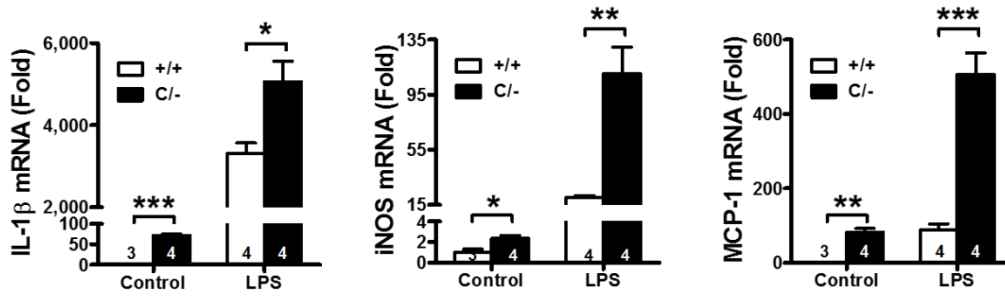

**Supplemental Figure S8. Macrophage activation in WT and *Pparg*<sup>C/-</sup> mice.** Basal and LPS-stimulated mRNA levels of IL-1 $\beta$ , iNOS and MCP-1 in peritoneal macrophages. LPS (500 ng/ml) was stimulated for 3.5 hours. Numbers inside bars indicate the number for each group. \* $p < 0.05$ ; \*\* $p < 0.01$ ; \*\*\* $p < 0.001$ .

**Table SI Flow cytometric analyses of splenic cells from younger WT and *Pparg*<sup>C/-</sup> mice**

|                                                         | WT                                           | <i>Pparg</i> <sup>C/-</sup> | P-value |
|---------------------------------------------------------|----------------------------------------------|-----------------------------|---------|
| <b>% of splenic cells</b>                               |                                              |                             |         |
| CD19 <sup>+</sup>                                       | 58.80 ± 1.89                                 | 58.38 ± 0.84                | 0.844   |
| CD3 <sup>+</sup>                                        | 33.84 ± 1.73                                 | 31.75 ± 1.24                | 0.366   |
| CD11C <sup>+</sup> FSC <sup>+</sup>                     | 2.48 ± 0.53                                  | 1.93 ± 0.31                 | 0.380   |
| Gr-1 <sup>-</sup> CD11b <sup>+</sup> F4/80 <sup>+</sup> | 3.43 ± 0.53                                  | 2.72 ± 0.48                 | 0.371   |
| <b>B-cell subtypes</b>                                  | <b>% of splenic CD19<sup>+</sup> B cells</b> |                             |         |
| IgM <sup>high</sup> IgD <sup>low</sup>                  | 19.53 ± 1.40                                 | 18.05 ± 1.61                | 0.514   |
| IgM <sup>high</sup> IgD <sup>high</sup>                 | 14.38 ± 0.34                                 | 13.51 ± 0.90                | 0.400   |
| IgM <sup>low</sup> IgD <sup>high</sup>                  | 44.48 ± 1.14                                 | 48.20 ± 1.77                | 0.126   |
| CD21 <sup>low</sup> CD23 <sup>+</sup>                   | 68.41 ± 1.17                                 | 69.90 ± 0.61                | 0.306   |
| CD21 <sup>high</sup> CD23 <sup>-</sup>                  | 13.00 ± 0.87                                 | 10.27 ± 0.78                | 0.058   |
| <b>Plasma cells</b>                                     | <b>% of splenic cells</b>                    |                             |         |
| CD19 <sup>low</sup> CD138 <sup>+</sup>                  | 1.45 ± 0.20                                  | 1.57 ± 0.44                 | 0.575   |
| <b>Germinal center B cells</b>                          | <b>% of splenic cells</b>                    |                             |         |
| B220 <sup>+</sup> PNA <sup>hi</sup>                     | 1.07 ± 0.11                                  | 0.86 ± 0.21                 | 0.424   |
| <b>T cell subtypes</b>                                  | <b>% of splenic CD3<sup>+</sup> T cells</b>  |                             |         |
| CD4 <sup>+</sup>                                        | 52.94 ± 4.94                                 | 59.61 ± 3.53                | 0.314   |
| CD8 <sup>+</sup>                                        | 47.50 ± 0.87                                 | 49.94 ± 3.04                | 0.414   |
| <b>CD62L and CD44 profile</b>                           | <b>% of splenic CD4<sup>+</sup> T cells</b>  |                             |         |
| CD62L <sup>hi</sup> CD44 <sup>low</sup>                 | 69.43 ± 2.36                                 | 73.95 ± 2.78                | 0.261   |
| CD62L <sup>hi</sup> CD44 <sup>hi</sup>                  | 16.13 ± 1.79                                 | 14.43 ± 1.78                | 0.526   |
| CD62L <sup>low</sup> CD44 <sup>hi</sup>                 | 7.19 ± 0.17                                  | 6.73 ± 0.62                 | 0.496   |

Four 5-mo-old mice per group were analyzed and the data are presented as the average ± SEM for each group.

**Table SII Flow cytometric analyses of splenic cells from older WT and *Pparg*<sup>C/-</sup> mice**

|                                                         | WT           | <i>Pparg</i> <sup>C/-</sup> | P-value |
|---------------------------------------------------------|--------------|-----------------------------|---------|
| <b>% of splenic cells</b>                               |              |                             |         |
| CD19 <sup>+</sup>                                       | 45.08 ± 1.78 | 50.08 ± 0.71                | 0.197   |
| CD3 <sup>+</sup>                                        | 41.48 ± 2.56 | 35.38 ± 2.36                | 0.124   |
| CD11C <sup>+</sup> FSC <sup>+</sup>                     | 3.28 ± 0.50  | 3.63 ± 0.37                 | 0.591   |
| Gr-1 <sup>-</sup> CD11b <sup>+</sup> F4/80 <sup>+</sup> | 6.86 ± 1.65  | 6.07 ± 1.13                 | 0.704   |
| <b>B-cell subtypes</b>                                  |              |                             |         |
| <b>% of splenic CD19<sup>+</sup> B cells</b>            |              |                             |         |
| IgM <sup>high</sup> IgD <sup>low</sup>                  | 13.44 ± 0.32 | 13.72 ± 0.88                | 0.772   |
| IgM <sup>high</sup> IgD <sup>high</sup>                 | 11.74 ± 1.46 | 13.70 ± 1.34                | 0.320   |
| IgM <sup>low</sup> IgD <sup>high</sup>                  | 42.98 ± 2.51 | 38.92 ± 3.23                | 0.350   |
| CD21 <sup>low</sup> CD23 <sup>+</sup>                   | 62.22 ± 2.19 | 65.04 ± 0.74                | 0.257   |
| CD21 <sup>high</sup> CD23 <sup>-</sup>                  | 13.42 ± 0.97 | 11.64 ± 0.49                | 0.140   |
| <b>Plasma cells</b>                                     |              |                             |         |
| <b>% of splenic cells</b>                               |              |                             |         |
| CD19 <sup>low</sup> CD138 <sup>+</sup>                  | 0.65 ± 0.75  | 0.61 ± 0.15                 | 0.860   |
| <b>Germinal center B cells</b>                          |              |                             |         |
| <b>% of splenic cells</b>                               |              |                             |         |
| B220 <sup>+</sup> PNA <sup>hi</sup>                     | 2.23 ± 0.38  | 2.09 ± 0.21                 | 0.760   |
| <b>T-cell subtypes</b>                                  |              |                             |         |
| <b>% of splenic CD3<sup>+</sup> T cells</b>             |              |                             |         |
| CD4 <sup>+</sup>                                        | 32.51 ± 2.14 | 35.56 ± 2.98                | 0.429   |
| CD8 <sup>+</sup>                                        | 30.29 ± 2.17 | 22.52 ± 3.44                | 0.073   |
| <b>CD62L and CD44 profile</b>                           |              |                             |         |
| <b>% of splenic CD4<sup>+</sup> T cells</b>             |              |                             |         |
| CD62L <sup>hi</sup> CD44 <sup>low</sup>                 | 55.72 ± 4.54 | 48.30 ± 5.07                | 0.307   |
| CD62L <sup>hi</sup> CD44 <sup>hi</sup>                  | 20.30 ± 2.16 | 26.28 ± 3.10                | 0.152   |
| CD62L <sup>low</sup> CD44 <sup>hi</sup>                 | 8.76 ± 0.86  | 9.51 ± 0.35                 | 0.437   |

Five 14-mo-old mice per group were analyzed and the data are presented as the average ± SEM for each group.

**Table SIII Complete blood cell counts in WT and *Pparg*<sup>C/-</sup> mice**

| <b>Genotype</b>                   | <b>WBC<br/>(K/<math>\mu</math>l)</b> | <b>Lymphocyte<br/>(K/<math>\mu</math>l)</b> | <b>CD19<sup>+</sup> B cell<br/>(K/<math>\mu</math>l)</b> | <b>CD3<sup>+</sup> T cell<br/>(K/<math>\mu</math>l)</b> |
|-----------------------------------|--------------------------------------|---------------------------------------------|----------------------------------------------------------|---------------------------------------------------------|
| <b>WT</b>                         | 9.56 $\pm$ 0.67                      | 7.29 $\pm$ 0.61                             | 4.32 $\pm$ 0.33                                          | 2.23 $\pm$ 0.34                                         |
| <b><i>Pparg</i><sup>C/-</sup></b> | 9.22 $\pm$ 0.46                      | 7.21 $\pm$ 0.30                             | 4.46 $\pm$ 0.33                                          | 1.90 $\pm$ 0.34                                         |

Four 4-mo-old mice per group were analyzed and the data are presented as the average  $\pm$  SEM for each group.
